# Supplementary material for: Long-Term Infectious Morbidity of Premature Infants: Is There a Critical Threshold?
Source: PubMed Central journal article supplement (PMC7563528; doi:10.3390/jcm9093008), 2020-09-18
Supplement: jcm-09-03008-s001.pdf [file jcm-09-03008-s001.pdf]

## Supplement Table

---

|       |                                                              |
|-------|--------------------------------------------------------------|
| 5901  | ACUTE PYELONEPHRITIS                                         |
| 5950  | ACUTE CYSTITIS                                               |
| 5959  | CYSTITIS, UNSPECIFIED                                        |
| 5970  | URETHRAL ABSCESS                                             |
| 5990  | URINARY TRACT INFECTION, SITE NOT SPECIFIED                  |
| 59010 | AC.PYELONEPHRITIS WITHOUT LESION OF RENAL MEDULLARY NECROSIS |
| 59080 | PYELONEPHRITIS, UNSPECIFIED                                  |
| 59581 | CYSTITIS CYSTICA                                             |
| 59589 | OTHER SPECIFIED TYPES OF CYSTITIS                            |
| 59780 | URETHRITIS, UNSPECIFIED                                      |
| 59789 | OTHER URETHRITIS                                             |
| V1302 | PERSONAL HISTORY OF URINARY (TRACT) INFECTION                |
| 008   | INTESTINAL INFECTIONS DUE TO OTHER ORGANISMS                 |
| 0030  | SALMONELLA GASTROENTERITIS                                   |
| 0039  | SALMONELLA INFECTION, UNSPECIFIED                            |
| 0040  | SHIGELLA DYSENTERIAE                                         |
| 0041  | SHIGELLA FLEXNERI                                            |
| 0042  | SHIGELLA BOYDII                                              |
| 0043  | SHIGELLA SONNEI                                              |
| 0048  | OTHER SPECIFIED SHIGELLA INFECTIONS                          |
| 0049  | SHIGELLOSIS, UNSPECIFIED                                     |
| 0051  | BOTULISM                                                     |
| 0059  | FOOD POISONING, UNSPECIFIED                                  |
| 0068  | AMEBIC INFECTION OF OTHER SITES                              |
| 0069  | AMEBIASIS, UNSPECIFIED                                       |
| 0070  | BALANTIDIASIS                                                |
| 0071  | GIARDIASIS                                                   |
| 0078  | OTHER SPECIFIED PROTOZOAL INTESTINAL DISEASES                |
| 0079  | UNSPECIFIED PROTOZOAL INTESTINAL DISEASE                     |
| 0084  | INTESTINAL INFECTION DUE TO OTHER SPECIFIED BACTERIA         |
| 0085  | BACTERIAL ENTERITIS, UNSPECIFIED                             |

---

---

|       |                                                               |
|-------|---------------------------------------------------------------|
| 0088  | INTESTINAL INFECTION DUE TO OTHER ORGANISM,NOT ELSEW.CLASS.   |
| 0090  | INFECTIOUS COLITIS, ENTERITIS, & GASTROENTERITIS              |
| 0090  | INFECTIOUS COLITIS, ENTERITIS, AND GASTROENTERITIS            |
| 0091  | COLITIS,ENTERITIS,GASTROENTERITIS OF PRESUMED INF. ORIGIN     |
| 0092  | INFECTIOUS DIARRHEA                                           |
| 129   | INTESTINAL PARASITISM, UNSPECIFIED                            |
| 00842 | INTESTINAL INFEC. DUE TO PSEUDOMONAS                          |
| 00843 | INTESTINAL INFEC. DUE TO CAMPYLOBACTER                        |
| 00845 | INTESTINAL INFEC. DUE TO CLOSTRIDIUM DIFFICILE                |
| 00861 | ENTERITIS DUE TO ROTAVIRUS                                    |
| 00862 | ENTERITIS DUE TO ADENOVIRUS                                   |
| 00865 | ENTERITIS DUE TO CALICIVIRUS                                  |
| 00867 | ENTERITIS DUE TO ENTEROVIRUS, N.E.C.                          |
| 00869 | OTHER VIRAL ENTERITIS                                         |
| 1274  | ENTEROBIASIS                                                  |
| 1278  | MIXED INTESTINAL HELMINTHIASIS                                |
| 1279  | INTESTINAL HELMINTHIASIS, UNSPECIFIED                         |
| 1289  | HELMINTH INFECTION, UNSPECIFIED                               |
| 5902  | RENAL AND PERINEPHRIC ABSCESS                                 |
| V023  | CARRIER OR SUSP.CARRIER OF OTHER GASTROINTESTINAL PATHOGENS   |
| 0022  | PARATYPHOID FEVER B                                           |
| 0023  | PARATYPHOID FEVER C                                           |
| 048   | OTHER ENTEROVIRUS DISEASES OF CENTRAL NERVOUS SYSTEM          |
| 320   | BACTERIAL MENINGITIS                                          |
| 322   | MENINGITIS OF UNSPECIFIED CAUSE                               |
| 325   | PHLEBITIS AND THROMBOPHLEBITIS OF INTRACRANIAL VENOUS SINUSES |
| 326   | LATE EFFECTS OF INTRACRANIAL ABSCESS OR PYOGENIC INFECTION    |
| 0470  | MENINGITIS DUE TO COXSACKIE VIRUS                             |
| 0471  | MENINGITIS DUE TO ECHO VIRUS                                  |
| 0478  | OTHER SPECIFIED VIRAL MENINGITIS                              |
| 0479  | UNSPECIFIED VIRAL MENINGITIS                                  |
| 0491  | NON-ARTHROPOD-BORNE MENINGITIS DUE TO ADENOVIRUS              |
| 0499  | UNSP.NON-ARTHROPOD-BORNE VIRAL DIS.OF CENTRAL NERVOUS SYSTEM  |
| 0630  | RUSSIAN SPRING-SUMMER (TAIGA) ENCEPHALITIS                    |

---

---

|       |                                                                    |
|-------|--------------------------------------------------------------------|
| 3200  | HEMOPHILUS MENINGITIS                                              |
| 3201  | PNEUMOCOCCAL MENINGITIS                                            |
| 3202  | STREPTOCOCCAL MENINGITIS                                           |
| 3203  | STAPHYLOCOCCAL MENINGITIS                                          |
| 3207  | MENINGITIS IN OTHER BACTERIAL DISEASES CLASSIFIED ELSEWHERE        |
| 3208  | MENINGITIS DUE TO OTHER SPECIFIED BACTERIA                         |
| 3209  | MENINGITIS DUE TO UNSPECIFIED BACTERIUM                            |
| 3229  | MENINGITIS, UNSPECIFIED                                            |
| 3236  | POSTINFECTIOUS ENCEPHALITIS                                        |
| 3238  | OTHER CAUSES OF ENCEPHALITIS                                       |
| 3238  | OTHER CAUSES OF ENCEPHALITIS, MYELITIS AND ENCEPHALOMYELITIS       |
| 3239  | UNSPECIFIED CAUSE OF ENCEPHALITIS                                  |
| 3239  | UNSPECIFIED CAUSE OF ENCEPHALITIS, MYELITIS, AND ENCEPHALOMYELITIS |
| 3240  | INTRACRANIAL ABSCESS                                               |
| 3241  | INTRASPINAL ABSCESS                                                |
| 3249  | INTRACRANIAL AND INTRASPINAL ABSCESS OF UNSPECIFIED SITE           |
| 06641 | WEST NILE FEVER WITH ENCEPHALITIS                                  |
| 32082 | MENINGITIS DUE TO GRAM-NEGATIVE                                    |
| 32089 | MENINGITIS DUE TO OTHER SPECIFIED BACTERIA                         |
| 32361 | INFECTIOUS ACUTE DISSEMINATED ENCEPHALOMYELITIS (ADEM)             |
| 32381 | OTHER CAUSES OF ENCEPHALITIS AND ENCEPHALOMYELITIS                 |
| 32382 | OTHER CAUSES OF MYELITIS                                           |
| 0031  | SALMONELLA SEPTICEMIA                                              |
| 0038  | OTHER SPECIFIED SALMONELLA INFECTIONS                              |
| 00321 | SALMONELLA MENINGITIS                                              |
| 00323 | SALMONELLA ARTHRITIS                                               |
| 00329 | OTHER LOCALIZED SALMONELLA INFECTIONS                              |
| 04186 | HELICOBACTER PYLORI (H. PYLORI) INFECTION                          |
| 0119  | UNSPECIFIED PULMONARY TUBERCULOSIS                                 |
| 01090 | PRIM. TB. INFEC., UNSP. TYPE, UNSP. EXAMINATION                    |
| 01120 | TB. OF LUNG + CAVITATION, UNSP. EXAMINATION                        |
| 01190 | UNSP. PULMONARY TB., UNSP. EXAMINATION                             |
| 01194 | UNSP. PULMONARY TB., FOUND BY BACTERIAL CULTURE                    |
| 01304 | TB. MENINGITIS, FOUND BY BACTERIAL CULTURE                         |

---

---

|       |                                                        |
|-------|--------------------------------------------------------|
| 01311 | TUBERCULOMA OF MENINGES, BACT/HISTOL. EXAM. NOT DONE   |
| 01394 | UNSP. TB. OF C.N.S. FOUND BY BACTERIAL CULTURE         |
| 01404 | TB. PERITONITIS, FOUND BY BACTERIAL CULTURE            |
| 01485 | OTHER TB. INTESTINES, CONFIRMED HISTOLOGICALLY         |
| V1201 | PERSONAL HISTORY OF TUBERCULOSIS                       |
| 022   | ANTHRAX                                                |
| 0073  | INTESTINAL TRICHOMONIASIS                              |
| 0074  | CRYPTOSPORIDIOSIS                                      |
| 0075  | CYCLOSPORIASIS                                         |
| 0082  | INTESTINAL INFEC. DUE TO AEROBACTER AEROGENES          |
| 0205  | PNEUMONIC PLAGUE, UNSPECIFIED                          |
| 0209  | PLAGUE, UNSPECIFIED                                    |
| 0783  | CAT-SCRATCH DISEASE                                    |
| 0810  | MURINE (ENDEMIC) TYPHUS                                |
| 0820  | SPOTTED FEVERS                                         |
| 0830  | Q FEVER                                                |
| 0838  | OTHER SPECIFIED RICKETTSIOSIS                          |
| 0839  | RICKETTSIOSIS, UNSPECIFIED                             |
| 00841 | INTESTINAL INFEC. DUE TO STAPHYLOCOCCUS                |
| 0846  | MALARIA, UNSPECIFIED                                   |
| 0859  | LEISHMANIASIS, UNSPECIFIED                             |
| 0879  | RELAPSING FEVER, UNSPECIFIED                           |
| 0909  | CONGENITAL SYPHILIS, UNSPECIFIED                       |
| 0940  | TABES DORSALIS                                         |
| 0980  | GONOCOCCAL INFEC., ACUTE, OF LOWER GENITOURINARY TRACT |
| 1000  | LEPTOSPIROSIS ICTEROHEMORRHAGICA                       |
| 1160  | BLASTOMYCOSIS                                          |
| 1173  | ASPERGILLOSIS                                          |
| 1175  | CRYPTOCOCCOSIS                                         |
| 1177  | ZYGOMYCOSIS (PHYCOMYCOSIS OR MUCORMYCOSIS)             |
| 1179  | OTHER AND UNSPECIFIED MYCOSES                          |
| 1209  | SCHISTOSOMIASIS, UNSPECIFIED                           |
| 1225  | ECHINOCOCCUS MULTILOCULARIS INFECTION OF LIVER         |
| 1228  | ECHINOCOCCOSIS, UNSPECIFIED, OF LIVER                  |

---

---

|       |                                                                                                            |
|-------|------------------------------------------------------------------------------------------------------------|
| 1229  | ECHINOCOCCOSIS, OTHER AND UNSPECIFIED                                                                      |
| 1270  | ASCARIASIS                                                                                                 |
| 1363  | PNEUMOCYSTOSIS                                                                                             |
| 1369  | UNSP. INFECTIOUS & PARASITIC DISEASES                                                                      |
| 1369  | UNSPECIFIED INFECTIOUS AND PARASITIC DISEASES                                                              |
| 04183 | OTHER CLOSTRIDIUM PERFRINGENS INFECTION                                                                    |
| 08881 | LYME DISEASE (ERYTHEMA CHRONICUM MIGRANS)                                                                  |
| 08882 | BABESIOSIS                                                                                                 |
| 09840 | GONOCOCCAL CONJUNCTIVITIS (NEONATORUM)                                                                     |
| 09882 | GONOCOCCAL MENINGITIS                                                                                      |
| 09886 | GONOCOCCAL PERITONITIS                                                                                     |
| 0239  | BRUCELLOSIS, UNSPECIFIED                                                                                   |
| 0269  | UNSPECIFIED RAT-BITE FEVER                                                                                 |
| 0270  | LISTERIOSIS                                                                                                |
| 0312  | DISSEMINATED DISEASE DUE TO OTHER MYCOBACTERIA                                                             |
| 0319  | UNSPECIFIED DISEASES DUE TO MYCOBACTERIA                                                                   |
| 03283 | DIPHThERITIC PERITONITIS                                                                                   |
| 0418  | OTHER SPEC.BACTERIAL INF;IN CONDIT.CLASS.ELSEWHERE,UNSP.SITE                                               |
| 0419  | UNSP. BACTERIAL INFECTION, UNSP. SITE                                                                      |
| 0419  | UNSPEC.BACTERIAL INF;IN CONDIT. CLASSIF.ELSEWHERE,UNSP.SITE                                                |
| 04189 | OTHER SPECIFIED BACTERIA INFECTION                                                                         |
| 99762 | INFECTION (CHRONIC) OF AMPUTATION STUMP                                                                    |
| V091  | INFECTION WITH MICROORGAN. RESISTANT TO CEPHALOSPORINS/B-LACTAM ANTIBIOTICS                                |
| V0980 | INFECTION WITH MICROORGAN. RESISTANT TO OTHER SPEC. DRUGS, WITHOUT MENTION OF RESISTANCE TO MULTIPLE DRUGS |
| V0991 | INFECTION WITH DRUG-RESISTANT MICROORGAN.,UNSPEC. DRUG RESISTANCE NOS, WITH MULTIPLE DRUG RESISTANCE       |
| 0330  | WHOOPING COUGH DUE TO BORDETELLA PERTUSSIS (B. PERTUSSIS)                                                  |
| 0331  | WHOOPING COUGH DUE TO BORDETELLA PARAPERTUSSIS                                                             |
| 0339  | WHOOPING COUGH, UNSPECIFIED ORGANISM                                                                       |
| 034   | STREPTOCOCCAL SORE THROAT AND SCARLET FEVER                                                                |
| 035   | ERYSIPELAS                                                                                                 |
| 0340  | STREPTOCOCCAL SORE THROAT                                                                                  |
| 0341  | SCARLET FEVER                                                                                              |
| 0410  | STREPTOCOCCUS INFECT.IN CONDITION CLASSIF.ELSEWHERE;UNSP.SITE                                              |
| 0411  | STAPHYLOCOCCUS INFECT.IN CONDIT.CLASSIF.ELSEWHERE,UNSP.SITE                                                |

---

---

|       |                                                                      |
|-------|----------------------------------------------------------------------|
| 0411  | STAPHYLOCOCCUS INFECTION, UNSP. SITE                                 |
| 0412  | PNEUMOCOCCUS INFECTION IN CONDITION CLASSIFIED ELSEWHERE; UNSP. SITE |
| 0412  | PNEUMOCOCCUS INFECTION, UNSP. SITE                                   |
| 04100 | STREPTOCOCCUS INFECTION, UNSP.                                       |
| 04101 | STREPTOCOCCUS INFECTION, GROUP A                                     |
| 04101 | STREPTOCOCCUS INFECTION, GROUP A (ADDITIONAL CODE)                   |
| 04102 | STREPTOCOCCUS INFECTION, GROUP B                                     |
| 04103 | STREPTOCOCCUS INFECTION, GROUP C                                     |
| 04104 | STREPTOCOCCUS INFECTION, GROUP D (ENTEROCOCCUS)                      |
| 04105 | STREPTOCOCCUS INFECTION, GROUP G                                     |
| 04109 | OTHER STREPTOCOCCUS INFECTION                                        |
| 04110 | STAPHYLOCOCCUS INFECTION, UNSP.                                      |
| 04111 | METHICILLIN SUSCEPTIBLE STAPHYLOCOCCUS AUREUS                        |
| 04111 | STAPHYLOCOCCUS AUREUS INFECTION                                      |
| 04111 | STAPHYLOCOCCUS AUREUS INFECTION (ADDITIONAL CODE)                    |
| 04112 | METHICILLIN RESISTANT STAPHYLOCOCCUS AUREUS                          |
| 04119 | OTHER STAPHYLOCOCCUS INFECTION                                       |
| V0252 | CARRIER OR SUSP. CARRIER OF OTHER STREPTOCOCCUS                      |
| V0259 | CARRIER/SUSP. CARRIER OF OTHER SPECIFIED BACTERIAL DIS.              |
| 0360  | MENINGOCOCCAL MENINGITIS                                             |
| 0362  | MENINGOCOCCAL MENINGITIS                                             |
| 0369  | MENINGOCOCCAL INFECTION, UNSPECIFIED                                 |
| 03682 | MENINGOCOCCAL ARTHROPATHY                                            |
| 03689 | OTHER SPECIFIED MENINGOCOCCAL INFECTIONS                             |
| 0380  | STREPTOCOCCAL SEPTICEMIA                                             |
| 0381  | STAPHYLOCOCCAL SEPTICEMIA                                            |
| 0382  | PNEUMOCOCCAL SEPTICEMIA                                              |
| 0383  | SEPTICEMIA DUE TO ANAEROBES                                          |
| 0388  | OTHER SPECIFIED SEPTICEMIAS                                          |
| 0389  | UNSPECIFIED SEPTICEMIA                                               |
| 03810 | STAPHYLOCOCCAL SEPTICEMIA, UNSP.                                     |
| 03811 | METHICILLIN SUSCEPTIBLE STAPHYLOCOCCUS AUREUS SEPTICEMIA             |
| 03811 | STAPHYLOCOCCUS AUREUS SEPTICEMIA                                     |
| 03812 | METHICILLIN RESISTANT STAPHYLOCOCCUS AUREUS SEPTICEMIA               |

---

---

|        |                                                               |
|--------|---------------------------------------------------------------|
| 03819  | OTHER STAPHYLOCOCCAL SEPTICEMIA                               |
| 03840  | SEPTICEMIA DUE TO GRAM-NEGATIVE ORGANISM, UNSPECIFIED         |
| 03841  | SEPTICEMIA DUE TO HEMOPHILUS INFLUENZAE (H. INFLUENZAE)       |
| 03842  | SEPTICEMIA DUE TO ESCHERICHIA COLI (E. COLI)                  |
| 03843  | SEPTICEMIA DUE TO PSEUDOMONAS                                 |
| 03849  | OTHER SEPTICEMIA DUE TO GRAM-NEGATIVE ORGANISMS               |
| 038491 | KLEBSIELLA SEPTICEMIA                                         |
| 0388 1 | CANDIDA SEPTICEMIA                                            |
| 0388 2 | ENTEROCOCCUS SEPTICEMIA                                       |
| 0388 3 | ACITINOBACTER SEPTICEMIA                                      |
| 0413   | FRIEDLANDER'S BACILLUS, UNSP. SITE                            |
| 0413   | FRIEDLANDER'S BACILLUS;CONDITION CLASSIF.ELSEWHERE,UNSP.SITE  |
| 0413   | KLEBSIELLA PNEUMONIAE                                         |
| 0414   | ESCHERICHIA COLI (E. COLI), UNSP. SITE                        |
| 0414   | ESCHERICHIA COLI (E. COLI), UNSP. SITE (ADDITIONAL CODE)      |
| 0414   | ESCHERICHIA COLI(E. COLI),CONDITI.CLASSIF.ELSEWHERE,UNSP.SITE |
| 0415   | HEMOPHILUS INFLUENZAE IN CONDIT.CLASSIF.ELSEWHERE,UNSP.SITE   |
| 0415   | HEMOPHILUS INFLUENZAE, UNSP. SITE (H.INFLUENZAE)              |
| 0416   | PROTEUS (MIRABILIS,MORGANII), UNSP. SITE                      |
| 0416   | PROTEUS(MIRABILIS,MORGANII)CONDIT,CLASSIF.ELSEWHERE,UNSP.SITE |
| 0417   | PSEUDOMONAS INFEC., UNSP. SITE                                |
| 0417   | PSEUDOMONAS INFECT.IN CONDIT.CLASSIF.ELSEWHERE,UNSPEC.SITE    |
| 04185  | OTHER GRAM-NEGATIVE ORGANISMS INFECTION                       |
| 042    | HUMAN IMMUNODEFIC. VIRUS (HIV) DIS. /AIDS                     |
| V08    | ASYMPTOMATIC H.I.V INFECTION STATUS                           |
| 0521   | VARICELLA (HEMORRHAGIC) PNEUMONITIS                           |
| 0527   | CHICKENPOX WITH OTHER SPECIFIED COMPLICATIONS                 |
| 0528   | CHICKENPOX WITH UNSPECIFIED COMPLICATION                      |
| 0529   | VARICELLA WITHOUT MENTION OF COMPLICATION                     |
| 0539   | HERPES ZOSTER WITHOUT MENTION OF COMPLICATION                 |
| 0540   | ECZEMA HERPETICUM                                             |
| 0542   | HERPETIC GINGIVOSTOMATITIS                                    |
| 0543   | HERPETIC MENINGOENCEPHALITIS                                  |
| 0546   | HERPETIC WHITLOW                                              |

---

---

|       |                                                                    |
|-------|--------------------------------------------------------------------|
| 0549  | HERPES SIMPLEX WITHOUT MENTION OF COMPLICATION                     |
| 0559  | MEASLES WITHOUT MENTION OF COMPLICATION                            |
| 0569  | RUBELLA WITHOUT MENTION OF COMPLICATION                            |
| 0570  | ERYTHEMA INFECTIONOSUM (FIFTH DISEASE)                             |
| 0578  | OTHER SPECIFIED VIRAL EXANTHEMATA                                  |
| 0579  | VIRAL EXANTHEM, UNSPECIFIED                                        |
| 0723  | MUMPS PANCREATITIS                                                 |
| 0729  | MUMPS WITHOUT MENTION OF COMPLICATION                              |
| 0740  | HERPANGINA                                                         |
| 0743  | HAND, FOOT, AND MOUTH DISEASE                                      |
| 05311 | GENICULATE HERPES ZOSTER                                           |
| 05319 | HERPES ZOSTER + OTHER NERVOUS SYSTEM COMPLICATIONS                 |
| 05320 | HERPES ZOSTER DERMATITIS OF EYELID                                 |
| 05329 | HERPES ZOSTER + OTHER OPHTHALMIC COMPLICATIONS                     |
| 05410 | GENITAL HERPES, UNSPECIFIED                                        |
| 05440 | HERPES SIMPLEX + UNSP. OPHTHALMIC COMPLICATION                     |
| 05441 | HERPES SIMPLEX DERMATITIS OF EYELID                                |
| 05443 | HERPES SIMPLEX DISCIFORM KERATITIS                                 |
| 05449 | HERPES SIMPLEX WITH OTHER OPHTHALMIC COMPLICATIONS                 |
| 05472 | HERPES SIMPLEX MENINGITIS                                          |
| 05479 | HERPES SIMPLEX + OTHER SPEC. COMPLICATIONS                         |
| 05810 | ROSEOLA INFANTUM, UNSPECIFIED                                      |
| 05829 | OTHER HUMAN HERPESVIRUS ENCEPHALITIS                               |
| 0784  | FOOT AND MOUTH DISEASE                                             |
| 0701  | VIRAL HEPATITIS A WITHOUT HEPATIC COMA                             |
| 0701  | VIRAL HEPATITIS A WITHOUT MENTION OF HEPATIC COMA                  |
| 0709  | UNSP. VIRAL HEPATITIS WITHOUT HEPATIC COMA                         |
| 0709  | UNSPECIFIED VIRAL HEPATITIS WITHOUT MENTION OF HEPATIC COMA        |
| 07030 | VIRAL HEPATITIS B WITHOUT HEPATIC COMA & HEPATITIS DELTA -92       |
| 07030 | VIRAL HEPATITIS B WITHOUT HEPATIC COMA,AC/UNSP.WITHOUT HEP. DELTA  |
| 07032 | VIRAL HEPATITIS B WITHOUT HEPATIC COMA,CHR. WITHOUT HEPATITIS DELT |
| V0261 | HEPATITIS B CARRIER                                                |
| V0262 | HEPATITIS C CARRIER                                                |
| 075   | INFECTIOUS MONONUCLEOSIS                                           |

---



---

|       |                                                              |
|-------|--------------------------------------------------------------|
| 0785  | CYTOMEGALIC INCLUSION DISEASE                                |
| 0785  | CYTOMEGALOVIRAL DISEASE                                      |
| 0773  | OTHER ADENOVIRAL CONJUNCTIVITIS                              |
| 0774  | EPIDEMIC HEMORRHAGIC CONJUNCTIVITIS                          |
| 0779  | UNSPEC.DISEASES OF CONJUNCTIVA DUE TO VIRUSES AND CHLAMYDIAE |
| 07799 | UNSP. DIS. OF CONJUNCTIVA DUE TO VIRUSES                     |
| 0780  | MOLLUSCUM CONTAGIOSUM                                        |
| 0781  | VIRAL WARTS                                                  |
| 07810 | VIRAL WARTS, UNSPECIFIED                                     |
| 07811 | CONDYLOMA ACUMINATUM                                         |
| 07812 | PLANTAR WART                                                 |
| 07819 | OTHER SPECIFIED VIRAL WARTS                                  |
| 0790  | ADENOVIRUS INF.IN CONDITIONS CLASSIF.ELSEWHERE,UNSP.SITE     |
| 0790  | ADENOVIRUS INFECTION, UNSP. SITE                             |
| 0791  | ECHO VIRUS INFECTION, UNSP. SITE                             |
| 0792  | COXSACKIE VIRUS INFECTION, UNSP. SITE                        |
| 0793  | RHINOVIRUS INFECTION, UNSP. SITE                             |
| 0798  | OTHER SPECIFIED VIRAL INFECTION CLASSIF.ELSEWHERE,UNSP.SITE  |
| 0799  | UNSP. VIRAL & CHLANYDIAL INFECTION                           |
| 0799  | UNSP.VIRAL INFECT.IN CONDITIONS CLASSIF.ELSEWHERE,UNSP.SITE  |
| 07889 | OTHER SPECIFIED DISEASES DUE TO VIRUSES                      |
| 07889 | OTHER SPECIFIED DISEASES DUE TO VIRUSES AND CHLAMYDIAE       |
| 07950 | RETROVIRUS, UNSP.,UNSP. SITE                                 |
| 07959 | OTHER SPECIFIED RETROVIRUS                                   |
| 07989 | OTHER SPEC. VIRAL INFECTION                                  |
| 07999 | UNSP. VIRAL INFECTION                                        |
| 07999 | UNSP. VIRAL INFECTION (ADDITIONAL CODE)                      |
| 0796  | RESPIRATORY SYNCYTIAL VIRUS (RSV)                            |
| 1100  | DERMATOPHYTOSIS OF SCALP AND BEARD                           |
| 1101  | DERMATOPHYTOSIS OF NAIL                                      |
| 1103  | DERMATOPHYTOSIS OF GROIN AND PERIANAL AREA                   |
| 1104  | DERMATOPHYTOSIS OF FOOT                                      |
| 1105  | DERMATOPHYTOSIS OF THE BODY                                  |
| 1109  | DERMATOPHYTOSIS OF UNSPECIFIED SITE                          |

---

---

|       |                                                                |
|-------|----------------------------------------------------------------|
| 1110  | PITYRIASIS VERSICOLOR                                          |
| 1118  | OTHER SPECIFIED DERMATOMYCOSES                                 |
| 1119  | DERMATOMYCOSIS, UNSPECIFIED                                    |
| 1120  | CANDIDIASIS OF MOUTH                                           |
| 1121  | CANDIDIASIS OF VULVA AND VAGINA                                |
| 1122  | CANDIDIASIS OF OTHER UROGENITAL SITES                          |
| 1123  | CANDIDIASIS OF SKIN AND NAILS                                  |
| 1124  | CANDIDIASIS OF LUNG                                            |
| 1129  | CANDIDIASIS OF UNSPECIFIED SITE                                |
| 11281 | CANDIDAL ENDOCARDITIS                                          |
| 11282 | CANDIDAL OTITIS EXTERNA                                        |
| 11284 | CANDIDAL ESOPHAGITIS                                           |
| 11289 | OTHER CANDIDIASIS OF OTHER SPECIFIED SITES                     |
| 382   | SUPPURATIVE AND UNSPECIFIED OTITIS MEDIA                       |
| 3813  | OTHER AND UNSPECIFIED CHRONIC NONSUPPURATIVE OTITIS MEDIA      |
| 3814  | NONSUPPURATIVE OTITIS MEDIA, NOT SPECIFIED AS ACUTE OR CHRONIC |
| 3819  | UNSPECIFIED EUSTACHIAN TUBE DISORDER                           |
| 3820  | ACUTE SUPPURATIVE OTITIS MEDIA                                 |
| 3821  | CHRONIC TUBOTYMPANIC SUPPURATIVE OTITIS MEDIA                  |
| 3823  | UNSPECIFIED CHRONIC SUPPURATIVE OTITIS MEDIA                   |
| 3824  | UNSPECIFIED SUPPURATIVE OTITIS MEDIA                           |
| 3829  | UNSPECIFIED OTITIS MEDIA                                       |
| 3831  | CHRONIC MASTOIDITIS                                            |
| 3839  | UNSPECIFIED MASTOIDITIS                                        |
| 3841  | CHRONIC MYRINGITIS WITHOUT MENTION OF OTITIS MEDIA             |
| 3849  | UNSPECIFIED DISORDER OF TYMPANIC MEMBRANE                      |
| 38001 | ACUTE PERICHONDRIITIS OF PINNA                                 |
| 38002 | CHRONIC PERICHONDRIITIS OF PINNA                               |
| 38003 | CHONDRIITIS OF PINNA                                           |
| 38010 | INFECTIVE OTITIS EXTERNA, UNSPECIFIED                          |
| 38015 | CHRONIC MYCOTIC OTITIS EXTERNA                                 |
| 38022 | OTHER ACUTE OTITIS EXTERNA                                     |
| 38023 | OTHER CHRONIC OTITIS EXTERNA                                   |
| 38100 | ACUTE NONSUPPURATIVE OTITIS MEDIA, UNSPECIFIED                 |

---

---

|       |                                                              |
|-------|--------------------------------------------------------------|
| 38101 | ACUTE SEROUS OTITIS MEDIA                                    |
| 38104 | ACUTE ALLERGIC SEROUS OTITIS MEDIA                           |
| 38110 | CHRONIC SEROUS OTITIS MEDIA, SIMPLE OR UNSPECIFIED           |
| 38119 | OTHER CHRONIC SEROUS OTITIS MEDIA                            |
| 38129 | OTHER CHRONIC MUCOID OTITIS MEDIA                            |
| 38200 | AC.SUPPURAT.OTITIS MEDIA WITHOUT SPONTAN.RUPTURE OF EARDRUM  |
| 38201 | ACUTE SUPPURAT.OTITIS MEDIA WITH SPONTAN.RUPTURE OF EARDRUM  |
| 38300 | ACUTE MASTOIDITIS WITHOUT COMPLICATIONS                      |
| 38301 | SUBPERIOSTEAL ABSCESS OF MASTOID                             |
| 38330 | POSTMASTOIDECTOMY COMPLICATION, UNSPECIFIED                  |
| 38389 | OTHER DISORDERS OF MASTOID                                   |
| 38400 | ACUTE MYRINGITIS, UNSPECIFIED                                |
| 38401 | BULLOUS MYRINGITIS                                           |
| 38420 | PERFORATION OF TYMPANIC MEMBRANE, UNSPECIFIED                |
| 38482 | ATROPHIC NONFLACCID TYMPANIC MEMBRANE                        |
| 38500 | TYMPANOSCLEROSIS, UNSPECIFIED AS TO INVOLVEMENT              |
| 38510 | ADHESIVE MIDDLE EAR DISEASE, UNSPECIFIED AS TO INVOLVEMENT   |
| 38530 | CHOLESTEATOMA, UNSPECIFIED                                   |
| 38531 | CHOLESTEATOMA OF ATTIC                                       |
| 38532 | CHOLESTEATOMA OF MIDDLE EAR                                  |
| 38630 | LABYRINTHITIS, UNSPECIFIED                                   |
| 38635 | VIRAL LABYRINTHITIS                                          |
| 460   | ACUTE NASOPHARYNGITIS (COMMON COLD)                          |
| 462   | ACUTE PHARYNGITIS                                            |
| 463   | ACUTE TONSILLITIS                                            |
| 464   | ACUTE LARYNGITIS AND TRACHEITIS                              |
| 465   | ACUTE UPPER RESPIRATORY INFECTIONS OF MULTIPLE OR UNSP.SITES |
| 475   | PERITONSILLAR ABSCESS                                        |
| 4610  | ACUTE MAXILLARY SINUSITIS                                    |
| 4611  | ACUTE FRONTAL SINUSITIS                                      |
| 4612  | ACUTE ETHMOIDAL SINUSITIS                                    |
| 4613  | ACUTE SPHENOIDAL SINUSITIS                                   |
| 4618  | OTHER ACUTE SINUSITIS                                        |
| 4619  | ACUTE SINUSITIS, UNSPECIFIED                                 |

---

---

|       |                                                            |
|-------|------------------------------------------------------------|
| 4640  | ACUTE LARYNGITIS                                           |
| 4644  | CROUP                                                      |
| 4650  | ACUTE LARYNGOPHARYNGITIS                                   |
| 4658  | ACUTE UPPER RESPIRATORY INFECTIONS OF OTHER MULTIPLE SITES |
| 4659  | ACUTE UPPER RESPIRATORY INFECTIONS OF UNSPECIFIED SITE     |
| 4720  | CHRONIC RHINITIS                                           |
| 4730  | CHRONIC MAXILLARY SINUSITIS                                |
| 4731  | CHRONIC FRONTAL SINUSITIS                                  |
| 4732  | CHRONIC ETHMOIDAL SINUSITIS                                |
| 4733  | CHRONIC SPHENOIDAL SINUSITIS                               |
| 4738  | OTHER CHRONIC SINUSITIS                                    |
| 4739  | UNSPECIFIED SINUSITIS (CHRONIC)                            |
| 4741  | HYPERTROPHY OF TONSILS AND ADENOIDS                        |
| 4742  | ADENOID VEGETATIONS                                        |
| 4748  | OTHER CHRONIC DISEASE OF TONSILS AND ADENOIDS              |
| 4749  | UNSPECIFIED CHRONIC DISEASE OF TONSILS AND ADENOIDS        |
| 4870  | INFLUENZA WITH PNEUMONIA                                   |
| 4871  | INFLUENZA WITH OTHER RESPIRATORY MANIFESTATIONS            |
| 4878  | INFLUENZA WITH OTHER MANIFESTATIONS                        |
| 4880  | INFLUENZA DUE TO IDENTIFIED AVIAN INFLUENZA VIRUS          |
| 4881  | INFLUENZA DUE TO IDENTIFIED NOVEL H1N1 INFLUENZA VIRUS     |
| 46400 | ACUTE LARYNGITIS WITHOUT MENTION OF OBSTRUCTION            |
| 46410 | ACUTE TRACHEITIS WITHOUT MENTION OF OBSTRUCTION            |
| 46420 | ACUTE LARYNGOTRACHEITIS WITHOUT MENTION OF OBSTRUCTION     |
| 46430 | ACUTE EPIGLOTTITIS WITHOUT MENTION OF OBSTRUCTION          |
| 46450 | SUPRAGLOTTITIS WITHOUT MENTION OF OBSTRUCTION              |
| 47400 | CHRONIC TONSILLITIS                                        |
| 47401 | CHRONIC ADENOIDITIS                                        |
| 47410 | HYPERTROPHY OF TONSIL WITH ADENOIDS                        |
| 47411 | HYPERTROPHY OF TONSILS ALONE                               |
| 47412 | HYPERTROPHY OF ADENOIDS ALONE                              |
| 47822 | PARAPHARYNGEAL ABSCESS                                     |
| 47824 | RETROPHARYNGEAL ABSCESS                                    |
| 466   | ACUTE BRONCHITIS AND BRONCHIOLITIS                         |

---

---

|       |                                                                                             |
|-------|---------------------------------------------------------------------------------------------|
| 480   | VIRAL PNEUMONIA                                                                             |
| 490   | BRONCHITIS, NOT SPECIFIED AS ACUTE OR CHRONIC                                               |
| 4660  | ACUTE BRONCHITIS                                                                            |
| 4661  | ACUTE BRONCHIOLITIS                                                                         |
| 4800  | PNEUMONIA DUE TO ADENOVIRUS                                                                 |
| 4801  | PNEUMONIA DUE TO RESPIRATORY SYNCYTIAL VIRUS                                                |
| 4802  | PNEUMONIA DUE TO PARAINFLUENZA VIRUS                                                        |
| 4808  | PNEUMONIA DUE TO OTHER VIRUS NOT ELSEWHERE CLASSIFIED                                       |
| 4809  | VIRAL PNEUMONIA, UNSPECIFIED                                                                |
| 4841  | PNEUMONIA IN CYTOMEGALIC INCLUSION DISEASE                                                  |
| 4918  | OTHER CHRONIC BRONCHITIS                                                                    |
| 46611 | AC. BRONCHIOLITIS DUE TO RESPIRATORY SYNCYTIAL VIRUS (RSV)                                  |
| 46619 | AC. BRONCHIOLITIS DUE TO OTHER INFECTIOUS ORGANISMS                                         |
| 49121 | OBSTRUCTIVE CHR. BRONCHITIS WITH(ACUTE)EXACERBATION                                         |
| V1261 | PERSONAL HISTORY OF PNEUMONIA (RECURRENT)                                                   |
| 481   | PNEUMOCOCCAL PNEUMONIA                                                                      |
| 481   | PNEUMOCOCCAL PNEUMONIA (STREPTOCOCCUS PNEUMONIAE PNEUMONIA)                                 |
| 483   | PNEUMONIA DUE TO OTHER SPECIFIED ORGANISM                                                   |
| 4820  | PNEUMONIA DUE TO KLEBSIELLA PNEUMONIAE                                                      |
| 4821  | PNEUMONIA DUE TO PSEUDOMONAS                                                                |
| 4822  | PNEUMONIA DUE TO HEMOPHILUS INFLUENZAE (H. INFLUENZAE)                                      |
| 4823  | PNEUMONIA DUE TO STREPTOCOCCUS                                                              |
| 4829  | BACTERIAL PNEUMONIA, UNSPECIFIED                                                            |
| 4830  | PNEUMONIA DUE TO MYCOPLASMA PNEUMONIAE                                                      |
| 4831  | PNEUMONIA DUE TO CHLAMYDIA                                                                  |
| 4838  | PNEUMONIA DUE TO OTHER SPECIFIED ORGANISM                                                   |
| 48230 | PNEUMONIA DUE TO STREPTOCOCCUS, UNSPECIFIED                                                 |
| 48231 | PNEUMONIA DUE TO STREPTOCOCCUS, GROUP A                                                     |
| 48241 | PNEUMONIA DUE TO STAPHYLOCOCCUS AUREUS                                                      |
| 99590 | SYSTEMIC INFLAMMATORY RESPONSE SYNDROME, UNSPECIFIED                                        |
| 99591 | SEPSIS                                                                                      |
| 99591 | SYSTEMIC INFLAMMATORY RESPONSE SYNDROME DUE TO INFECTIOUS PROCESS WITHOUT ORGAN DYSFUNCTION |
| 99592 | SEVERE SEPSIS                                                                               |
| 99592 | SYSTEMIC INFLAMMATORY RESPONSE SYNDROME DUE TO INFECTIOUS PROCESS WITH ORGAN DYSFUNCTION    |

---

---

|       |                                              |
|-------|----------------------------------------------|
| 04181 | OTHER MYCOPLASMA INFECTION                   |
| 04181 | OTHER MYCOPLASMA INFECTION (ADDITIONAL CODE) |
| 101   | VINCENT'S ANGINA                             |
| 0400  | GAS GANGRENE                                 |
| 0990  | CHANCROID                                    |
| 0993  | REITER'S DISEASE                             |
| 0999  | VENEREAL DISEASE, UNSPECIFIED                |
| 1236  | HYMENOLEPIASIS                               |
| 1307  | TOXOPLASMOSIS OF OTHER SPECIFIED SITES       |
| 1309  | TOXOPLASMOSIS, UNSPECIFIED                   |
| 1320  | PEDICULUS CAPITIS (HEAD LOUSE)               |
| 1322  | PHTHIRUS PUBIS (PUBIC LOUSE)                 |
| 1323  | MIXED PEDICULOSIS INFESTATION                |
| 1329  | PEDICULOSIS, UNSPECIFIED                     |
| 1330  | SCABIES                                      |
| 1340  | MYIASIS                                      |
| 04082 | TOXIC SHOCK SYNDROME                         |
| 04089 | OTHER SPECIFIED BACTERIAL DISEASES           |
| 04184 | OTHER ANAEROBES INFECTION                    |
| 05442 | DENDRITIC KERATITIS                          |
| 07988 | OTHER SPEC. CHLAMYDIAL INFECTION             |
| 07998 | UNSP. CHLAMYDIAL INFECTION                   |

---
